# Supplementary material
Source: publisher figshare collection journal article supplement (https://gsapubs.figshare.com/ndownloader/files/22741706)
Supplement: Supplementary file 1 [file 22741706]

GSA Data Repository Item # 9110

Title of article Origin of late dolomite cement by CO<sub>2</sub>-saturated deep  
basin brines: Evidence from the Ozark region, central United States

Author(s) D.L. Leach, G.S. Plumlee, A.H. Hofstra, G.P. Landis, et al  
see Geology v. 19, p. 348 - 351

### Contents

2 figs. and 1 table (3 pgs.)

---

---

---

---

---

---

---

---

---

---

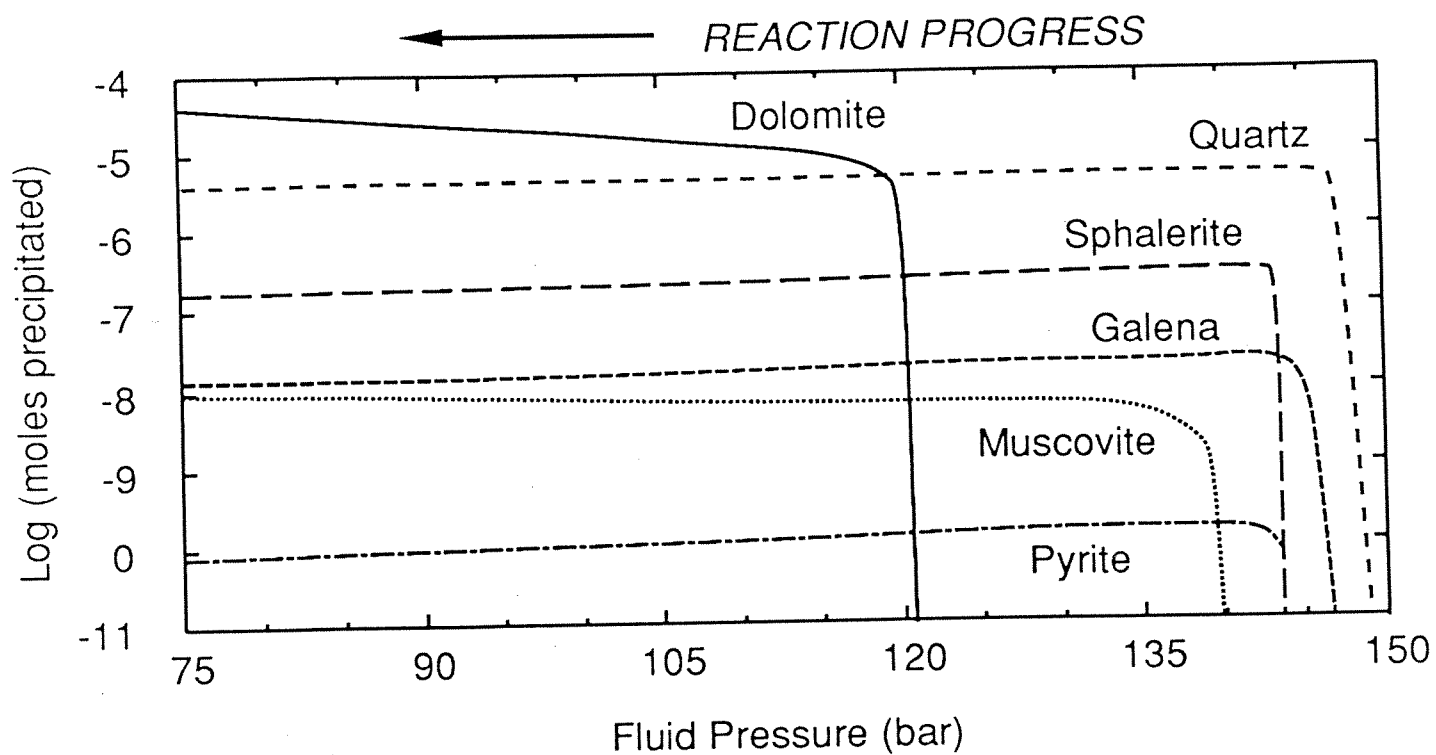

Figure 3. Log moles of minerals precipitated for each reaction step during the non isothermal boiling of reference fluid from 120 bar, 120 °C, to 75 bar, 110 °C. each reaction step is 3.75 bar and 0.5 °C.

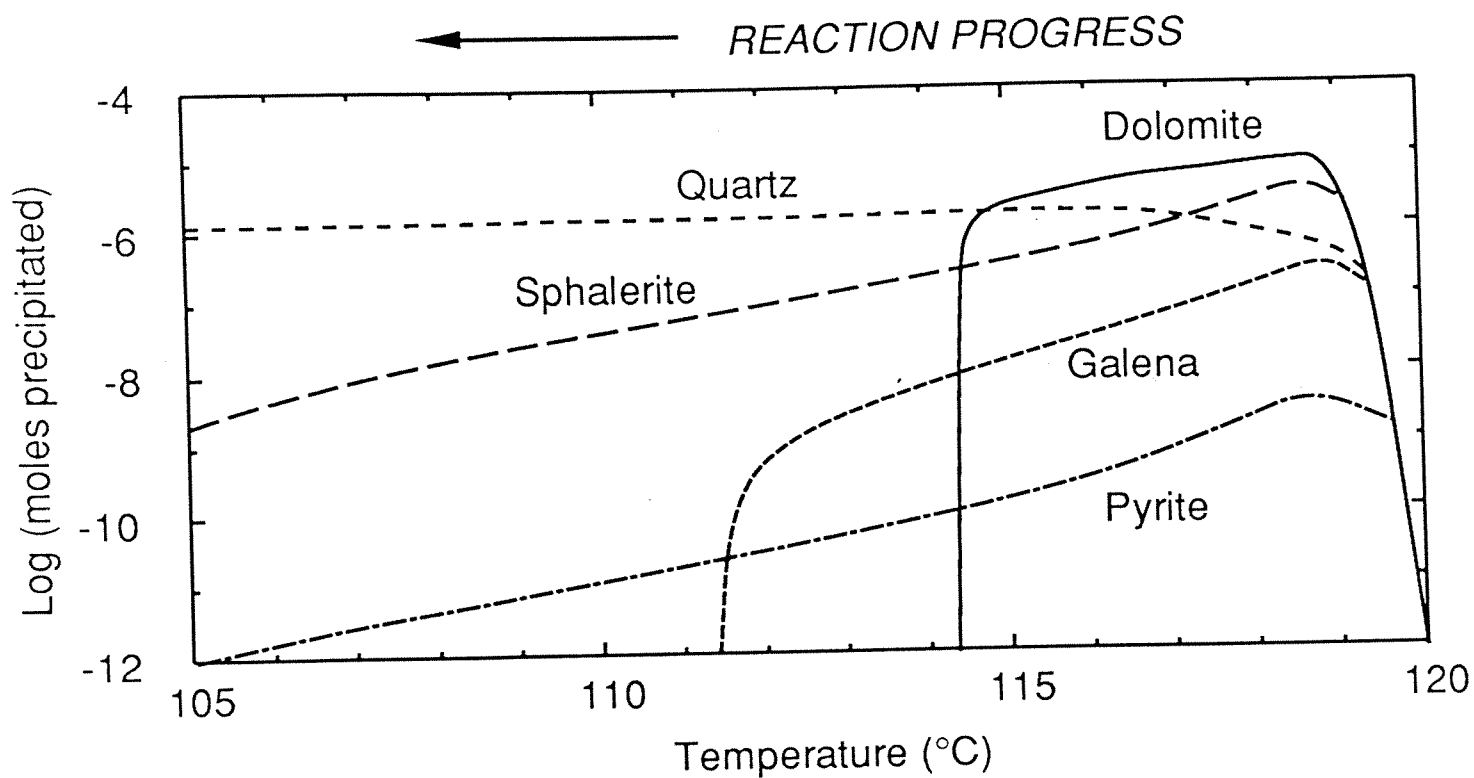

Figure 4. Log moles minerals precipitated during mixing of reference fluid at 120 °C with H<sub>2</sub>S-rich brine at 100 °C. Each reaction step mixes 0.1 kg of each fluid.

TABLE 2. SUMMARY OF RESULTS FOR SOME DOLOMITE-FORMATION REACTION PATHS.

| Reaction path*                                                                 | Results†                                                                                                                                        |
|--------------------------------------------------------------------------------|-------------------------------------------------------------------------------------------------------------------------------------------------|
| Boil reference fluid from 148 to 75 bar                                        | $7 \times 10^{-3}$ dol, $2 \times 10^{-7}$ musc, $2 \times 10^{-4}$ sl,<br>$2 \times 10^{-7}$ gn                                                |
| Boil reference fluid from 148 to 75 bar, 120 to 110 °C                         | $1 \times 10^{-4}$ qtz, $3 \times 10^{-7}$ gn, $5 \times 10^{-6}$ sl,<br>$2 \times 10^{-9}$ py, $1 \times 10^{-7}$ musc, $3 \times 10^{-4}$ dol |
| Boil high-CO <sub>2</sub> (0.8 mol) fluid from 240 to 75 bar                   | $3 \times 10^{-3}$ dol, $5 \times 10^{-7}$ musc, $9 \times 10^{-6}$ sl,<br>$6 \times 10^{-7}$ gn, $6 \times 10^{-10}$ py                        |
| Boil high-H <sub>2</sub> S (0.015 mol) fluid from 150 to 75 bar                | $8 \times 10^{-4}$ dol, $2 \times 10^{-7}$ gn, $1 \times 10^{-7}$ musc,<br>$2 \times 10^{-7}$ sl                                                |
| Boil moderate-salinity fluid (0.8 x salinity of ref. fluid) from 119 to 75 bar | $4 \times 10^{-4}$ dol, $6 \times 10^{-8}$ musc, $3 \times 10^{-7}$ sl,<br>$2 \times 10^{-8}$ gn                                                |
| Boil dilute fluid (0.2 x salinity of ref. fluid) from 64 to 40 bar             | $6 \times 10^{-8}$ musc, $7 \times 10^{-9}$ sl, $4 \times 10^{-9}$ gn,<br>$4 \times 10^{-12}$ py, $4 \times 10^{-4}$ dol                        |
| Boil reference fluid at 150 °C from 150 to 75 bar                              | $6 \times 10^{-4}$ dol, $2 \times 10^{-5}$ sl, $1 \times 10^{-6}$ gn,<br>$2 \times 10^{-7}$ musc, $6 \times 10^{-6}$ anh                        |
| Mix reference fluid with H <sub>2</sub> S-rich fluid at 100 °C                 | $2 \times 10^{-5}$ dol, $4 \times 10^{-5}$ qtz, $3 \times 10^{-7}$ gn,<br>$6 \times 10^{-6}$ sl, $4 \times 10^{-9}$ py                          |
| Cool reference fluid from 120 °C to 100 °C                                     | $2 \times 10^{-4}$ qtz, $3 \times 10^{-7}$ gn, $4 \times 10^{-6}$ sl,<br>$3 \times 10^{-9}$ py                                                  |
| React reference fluid with 60 °C limestone until calcite-saturated             | $7 \times 10^{-2}$ dol, $7 \times 10^{-6}$ qtz, $2 \times 10^{-6}$ gn,<br>$1 \times 10^{-7}$ musc, $3 \times 10^{-5}$ sl, $4 \times 10^{-8}$ pv |

\* Reference fluid composition given in Table 1.

† Results in total moles of minerals precipitated for each run by one kilogram of initial fluid. Minerals are listed sequentially according to their position in the precipitation sequence: dol = dolomite, qtz = quartz, sl = sphalerite, gn = galena, py = pyrite, musc = muscovite, and anh = anhydrite.
